# Supplementary material for: Visualisation of γH2AX Foci Caused by Heavy Ion Particle Traversal; Distinction between Core Track versus Non-Track Damage
Source: PubMed Central journal article supplement (PMC3743843; doi:10.1371/journal.pone.0070107), 2013-08-14

**Figure S2**

**A**

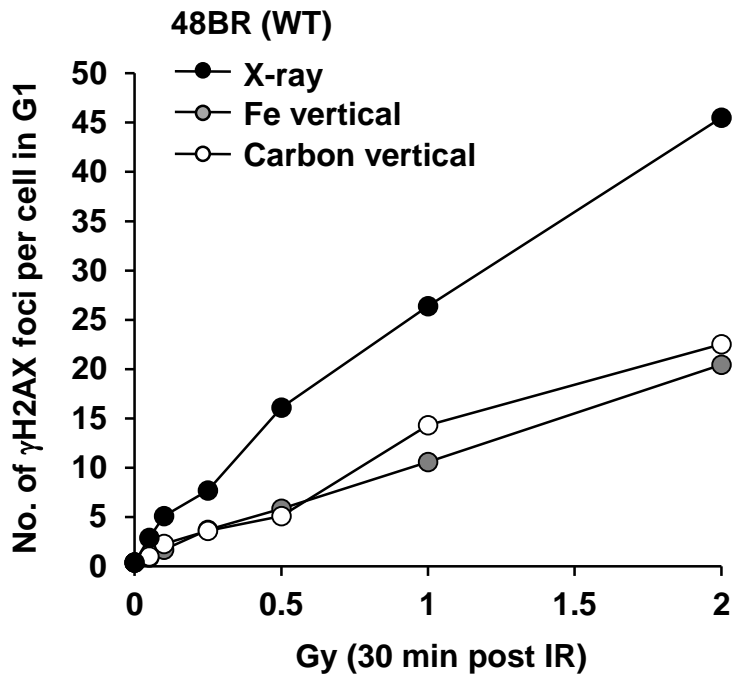

**B**

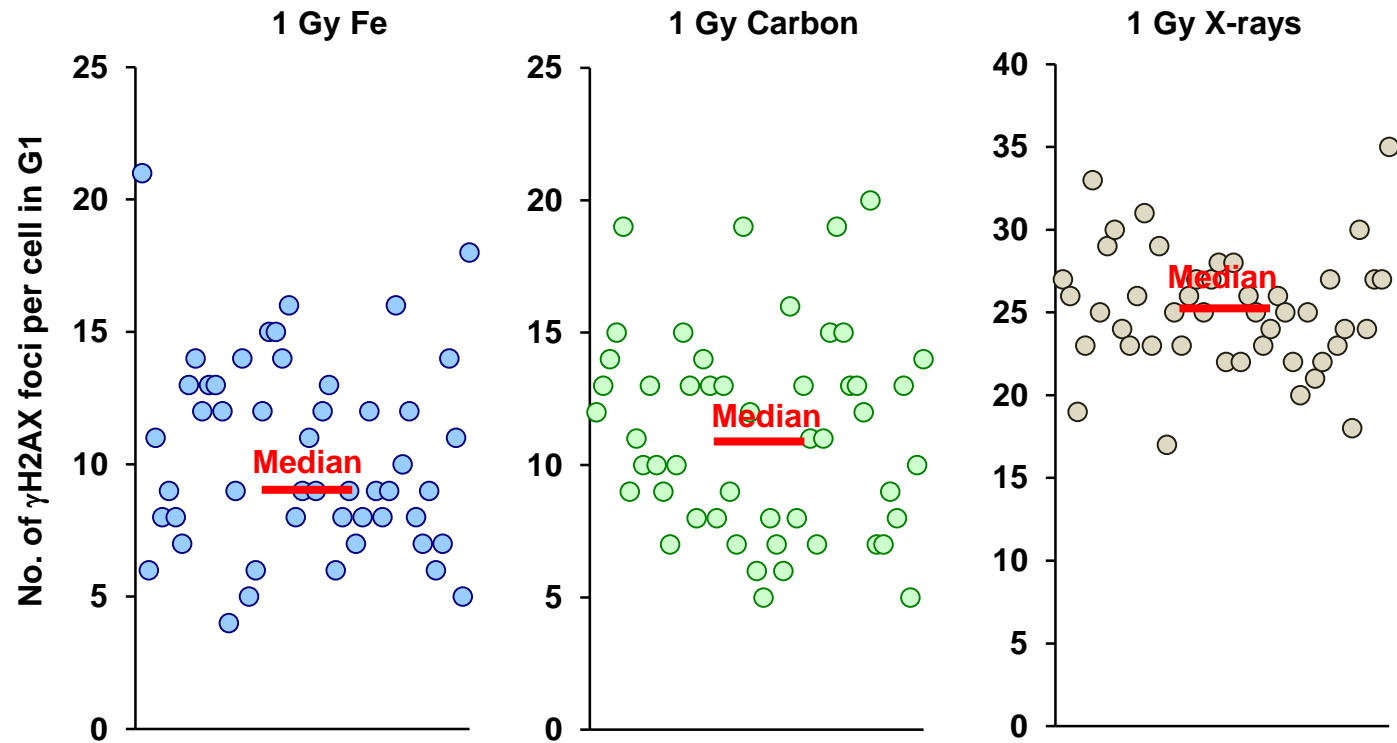

Supplement: pone.0070107.s002.pdf [file pone.0070107.s002.pdf]
